# Supplementary material for: Synthesis of ZnO quantum dot/graphene nanocomposites by atomic layer deposition with high lithium storage capacity
Source: Royal Society of Chemistry journal article supplement (doi:10.1039/c4ta00589a), 2014-01-01
Supplement: c4ta00589a1.pdf [file c4ta00589a1.pdf]

## Supporting Information

### **ZnO Quantum Dots/Graphene Nanocomposites by Atomic Layer Deposition with High Lithium Storage Capacity**

Xiang Sun,<sup>a</sup> Changgong Zhou,<sup>b</sup> Ming Xie,<sup>c,\*</sup> Hongtao Sun,<sup>a</sup> Tao Hu,<sup>a</sup> Fengyuan Lu,<sup>a</sup>

Spencer M. Scott,<sup>a</sup> Steven M. George,<sup>c</sup> Jie Lian<sup>a,\*</sup>

<sup>1</sup>Department of Mechanical, Aerospace & Nuclear Engineering, Rensselaer Polytechnic Institute, 110 8th Street Troy, NY 12180, United States

<sup>2</sup> Natural Science Department, Lawrence Technological University, Southfield, MI 48075, United States

<sup>3</sup> Department of Chemistry and Biochemistry and Department of Mechanical Engineering, University of Colorado at Boulder, Boulder, Colorado 80309, United States

**Table S1** \$/Ah for the common metal oxides estimated based on the price of their metal elements (\$/MT) and their theoretical capacity (Ah/kg).

| Metal | Anode                          | \$/kg 3 month average | Theoretical Capacity (mAh/g) | \$/Ah         |
|-------|--------------------------------|-----------------------|------------------------------|---------------|
| Al    | Al*                            | 2.13                  | 993                          | 0.0021        |
| Zn    | ZnO                            | 2.21                  | 978                          | <b>0.0022</b> |
| Mn    | MnO <sub>2</sub>               | 3.84                  | 1232                         | 0.0031        |
| Mn    | MnO                            | 3.84                  | 755                          | 0.0051        |
| Fe    | Fe <sub>2</sub> O <sub>3</sub> | 5.20                  | 1005                         | 0.0052        |
| Fe    | Fe <sub>3</sub> O <sub>4</sub> | 5.20                  | 925                          | 0.0056        |
| Cu    | CuO                            | 8.26                  | 674                          | 0.012         |
| Mo    | MoO <sub>3</sub>               | 24.80                 | 1117                         | 0.022         |
| Ni    | NiO                            | 18.38                 | 718                          | 0.026         |
| Co    | Co <sub>3</sub> O <sub>4</sub> | 26.00                 | 890                          | 0.029         |
| Mo    | MoO <sub>2</sub>               | 24.80                 | 830                          | 0.030         |
| Sn    | SnO <sub>2</sub>               | 24.93                 | 790                          | 0.0316        |
| Ti    | TiO <sub>2</sub> **            | 11.16                 | 330                          | 0.0338        |

<sup>a</sup> Prices obtained from MetalPrices.com, Winter 2013  
\*Al metal alloys with Li to form LiAl. Al<sub>2</sub>O<sub>3</sub> is inactive to Li<sup>+</sup>.  
\*\* TiO<sub>2</sub> intercalates/deintercalates with Li<sup>+</sup>.

-OH terminated Graphene

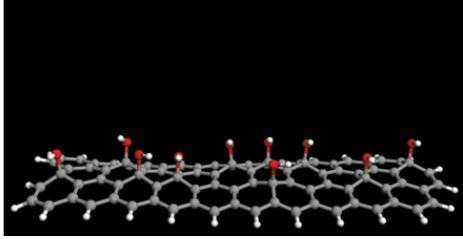

Chemisorbed TMA on Graphene

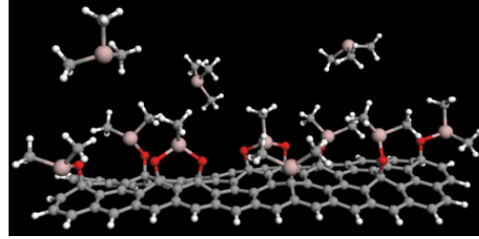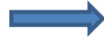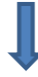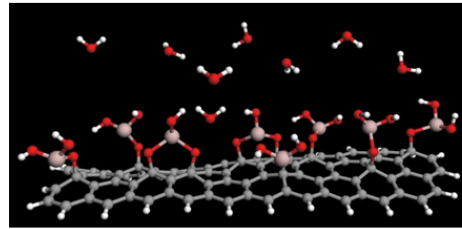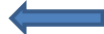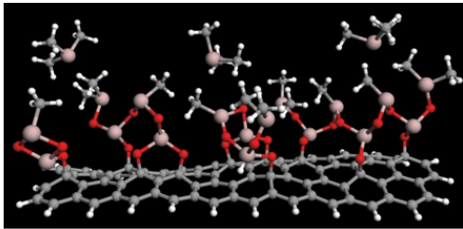

ALD cycle

H<sub>2</sub>O reacts with Chemisorbed TMA

Schematic of ALD reaction

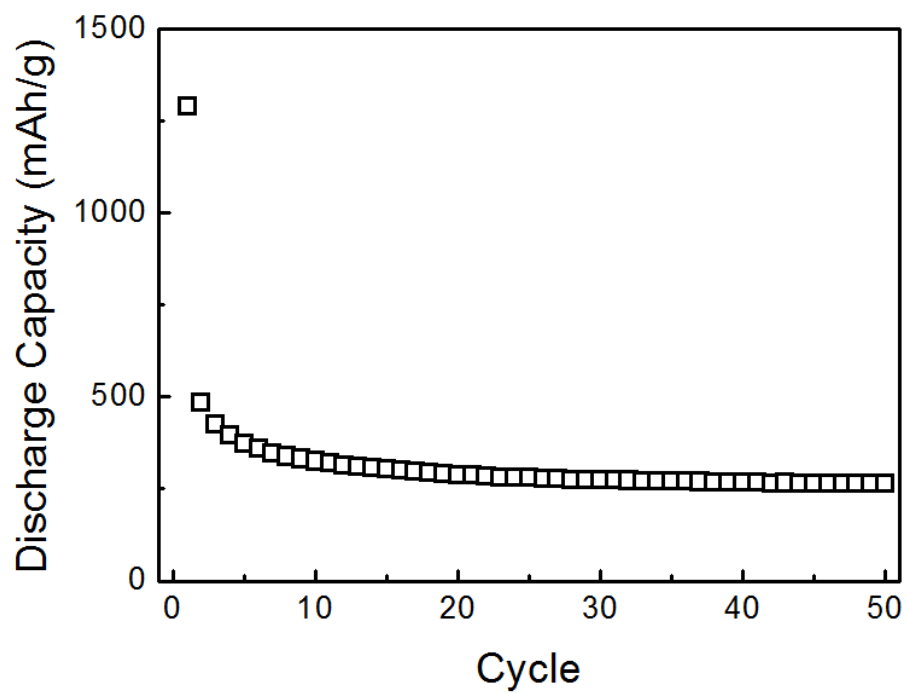

**Figure S1** Cycling performance of 5 cycle ALD Al<sub>2</sub>O<sub>3</sub> on graphene at 100 mA/g

### Specific capacitance calculation of ZnO

We deposited 5 cycles of ALD Al<sub>2</sub>O<sub>3</sub> on graphene to mimic the ZnO coverage at the defects and edge plane of graphene. Therefore, only intercalation between graphene layers will contribute to the capacitance of this composite. Figure S2 shows that the stable capacity of Al<sub>2</sub>O<sub>3</sub>-G after 50 cycles is only 258 mAh g<sup>-1</sup>.

The capacity contribution of ZnO in the composite can be extracted after considering the real contribution from graphene (capacity of Al<sub>2</sub>O<sub>3</sub>-G), as following:

$$C_{ZnO} = \frac{C_{total} - C_{Al_2O_3-G} \times W_{Al_2O_3-G}}{W_{ZnO}}$$

Where,  $C_{ZnO}$ ,  $C_{total}$ ,  $C_{Al_2O_3-G}$  are discharge specific capacitance of ZnO, ZnO-G composite, and ALD Al<sub>2</sub>O<sub>3</sub>-G, respectively.  $W_{Al_2O_3-G}$  and  $W_{ZnO}$  are mass percentage of graphene and ZnO in the composites.

Therefore, for 15 ALD ZnO-G composite,

$$C_{ZnO} = \frac{C_{total} - C_{Al_2O_3-G} \times 0.573}{0.427}$$

and for 30 ALD ZnO-G composite,

$$C_{ZnO} = \frac{C_{total} - C_{Al_2O_3-G} \times 0.318}{0.682}$$
